# Supplementary material
Source: PubMed Central journal article supplement (PMC3315237)
Supplement: supp_tpc.111.094581_Chapman_Supplemental_Data.pdf [file supp_tpc.111.094581_Chapman_Supplemental_Data.pdf]

Example imaging calculation for a 3 x 3 pixel area with 3 compounds (A, B,C):

| Spectra # | Position |   | Absolute Intensity (Counts) <sup>1</sup> |            |            | Relative Units (mol %) |            |            |
|-----------|----------|---|------------------------------------------|------------|------------|------------------------|------------|------------|
|           | X        | Y | Compound A                               | Compound B | Compound C | Compound A             | Compound B | Compound C |
| 1         | 0        | 0 | 50                                       | 50         | 0          | 50                     | 50         | 0          |
| 2         | 0        | 1 | 0                                        | 100        | 25         | 0                      | 80         | 20         |
| 3         | 0        | 2 | 100                                      | 50         | 50         | 50                     | 25         | 25         |
| 4         | 1        | 0 | 50                                       | 70         | 80         | 25                     | 35         | 40         |
| 5         | 1        | 1 | 0                                        | 50         | 75         | 0                      | 40         | 60         |
| 6         | 1        | 2 | 25                                       | 75         | 0          | 25                     | 75         | 0          |
| 7         | 2        | 0 | 500                                      | 500        | 0          | 50                     | 50         | 0          |
| 8         | 2        | 1 | 0                                        | 1000       | 250        | 0                      | 80         | 20         |
| 9         | 2        | 2 | 1000                                     | 500        | 500        | 50                     | 25         | 25         |

  

| Spectra # | X | Y | Greyscale Color (Red = Green = Blue) <sup>3</sup> |            |            | Greyscale Color (Red = Green = Blue) <sup>2,3</sup> |            |            |
|-----------|---|---|---------------------------------------------------|------------|------------|-----------------------------------------------------|------------|------------|
|           |   |   | Compound A                                        | Compound B | Compound C | Compound A                                          | Compound B | Compound C |
| 1         | 0 | 0 | 242                                               | 242        | 255        | 96                                                  | 96         | 255        |
| 2         | 0 | 1 | 255                                               | 229        | 242        | 255                                                 | 0          | 170        |
| 3         | 0 | 2 | 229                                               | 242        | 229        | 96                                                  | 175        | 149        |
| 4         | 1 | 0 | 242                                               | 237        | 214        | 175                                                 | 143        | 85         |
| 5         | 1 | 1 | 255                                               | 242        | 217        | 255                                                 | 127        | 0          |
| 6         | 1 | 2 | 249                                               | 236        | 255        | 175                                                 | 16         | 255        |
| 7         | 2 | 0 | 127                                               | 127        | 255        | 96                                                  | 96         | 255        |
| 8         | 2 | 1 | 255                                               | 0          | 127        | 255                                                 | 0          | 170        |
| 9         | 2 | 2 | 0                                                 | 127        | 0          | 96                                                  | 175        | 149        |

Notes:

1-Maximum value for Compound A, B, C will be 1000, 1000, 500 counts respectively

2-Maximum (relative) value for all compounds set to 80 mol %.

3-Example Microsoft Excel formula for greyscale conversion:

$$\text{Color} = 255 - \text{ROUND}((255 * \text{value} / \text{maxValue}),0)$$

**F**

| Y position | X position |       |       |
|------------|------------|-------|-------|
|            | 0          | 1     | 2     |
| 0          | {0,0}      | {1,0} | {2,0} |
| 1          | {0,1}      | {1,1} | {2,1} |
| 2          | {0,2}      | {1,2} | {2,2} |

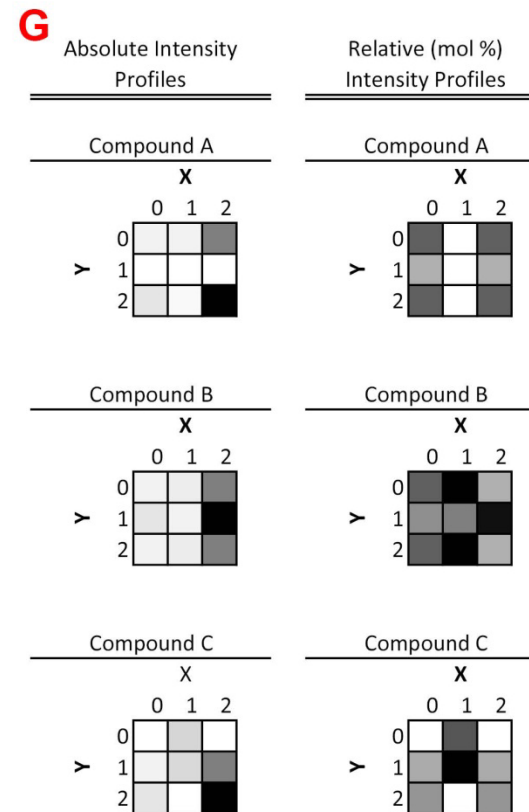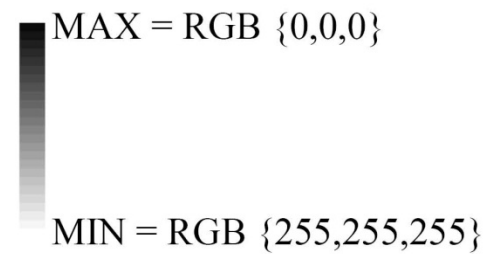

## Supplemental Figure 1.

Example conversion of raw MS data to a set of MS images on an absolute and relative scale.

- (A) Imaging setup:** MALDI-MS spectra are acquired at each x, y position within a 3 x 3 square for a total of 9 spectra (#1-9). Each spectrum will have an absolute x, y position associated with it as the laser rasterizes across each individual position. For example, in spectrum #1 the x, y position is {0, 0} and for spectrum #6 the x, y position is {1, 2}.
- (B) Data Acquisition:** Within each spectrum the absolute intensity (in counts) of 3 compounds (Compound A, Compound B, and Compound C) is acquired (see column Absolute Intensity (Counts)). For example, in spectra #5: Compound A's intensity was 0 counts, Compound B's intensity was 50 counts, and Compound C's intensity was 75 counts.
- (C) Calculation of relative compound values:** For each individual spectrum the relative units of each compound can be calculated as follows:
- 1) Determine the absolute intensity units of selected compounds within a spectrum: In spectrum #3 Compound A has 100 counts, Compound B has 50 counts, and Compound C has 50 counts
  - 2) Calculate the sum of the total counts for the selected spectrum: In spectrum #3 the total counts are 200 counts (Compound A counts + Compound B counts + Compound C counts = 100 counts + 50 counts + 50 counts).
  - 3) Divide a compound's absolute units by the total units within that spectrum. In spectrum #3 Compound A = 100 counts with the total counts for that spectrum 200 counts. Therefore Compound A is 50 mol % (100 counts / 200 counts \* 100% = 50 mol %). The counts can be converted to mol % since these are relative amounts calculated within a spectrum and are not absolute quantities. For Compounds B and C a similar calculation can be made to get 25 and 25 mol %, respectively. Therefore the maximum and minimum mol % a compound can be is 100 and 0%, respectively for a particular spectra.
- (D) Convert absolute counts into pixel RGB values:** To create a MS image representing the absolute distribution of a compound within the 3 x 3 area we need to convert the absolute intensity (in counts) into a Red-Green-Blue (RGB) value that can visually represent the absolute intensity.
- 1) Determine the maximum absolute intensity for a compound. For example, Compound A, B, and C's maximum intensities are 1000, 1000, and 500 counts respectively.
  - 2) Greyscale colors are generated by setting the Red = Green = Blue value with an 8-bit color system (0-255) (e.g. white = {255, 255, 255} and black {0, 0, 0}). The formula to convert an absolute intensity into a linear greyscale RGB value is: greyscale value = 255 - 255 \* absolute intensity / maximum absolute intensity. The final greyscale value should be rounded to an integer before image generation. For example for spectrum #1, Compound A: the greyscale value will equal 242 where the absolute intensity is 50 counts and the maximum intensity is 1000 counts

(=  $255 - 255 * 50 \text{ counts} / 1000 \text{ counts}$ ). This will correspond to a very light grey RGB representation {242, 242, 242}.

- 3) A similar image could be created (as done in the manuscript) by normalizing the counts for each compound relative to the total counts acquired for entire spectrum (i.e. including all other compounds identified and non-identified).

**(E) Convert relative mol % values into pixel RGB values:** To create an MS image representing the relative distribution of a compound within the 3 x 3 area we need to convert the relative intensity (in mol %) into a RGB value that can visually represent the relative units (in mol %).

- 1) Find the maximum value within all spectra across all compounds. While one could use a separate maximum mol % value for each compound this would not normalize the images to each other. Therefore in this case we choose a value that is either the maximum for all compounds over the entire area sampled. For example in this case the maximum mol % value is 80 (found in spectrum #8 of Compound B).
- 2) Convert each relative value as shown in Part D step 2 above into a greyscale value (=  $255 - 255 * \text{relative units} / \text{maximum relative units}$ ). In example, for spectrum #1 for Compound A, the greyscale value is 96 where the relative units for this compound 50 mol % and the maximum mol % is 80 (=  $255 - 255 * 50 \text{ units} / 80 \text{ units}$ ).

**(F) Imaging position setup:** Now that we have greyscale values for each x, y position we can create a 3 x 3 image using these values. Shown here is how each pixel of the box will correspond to the absolute x, y position.

**(G) Absolute intensity and relative intensity profiles** can be generated using the greyscale values for each individual x, y position. These images were generated using Microsoft Excel while images in the manuscript were generated using the LipidImager application using identical principles.

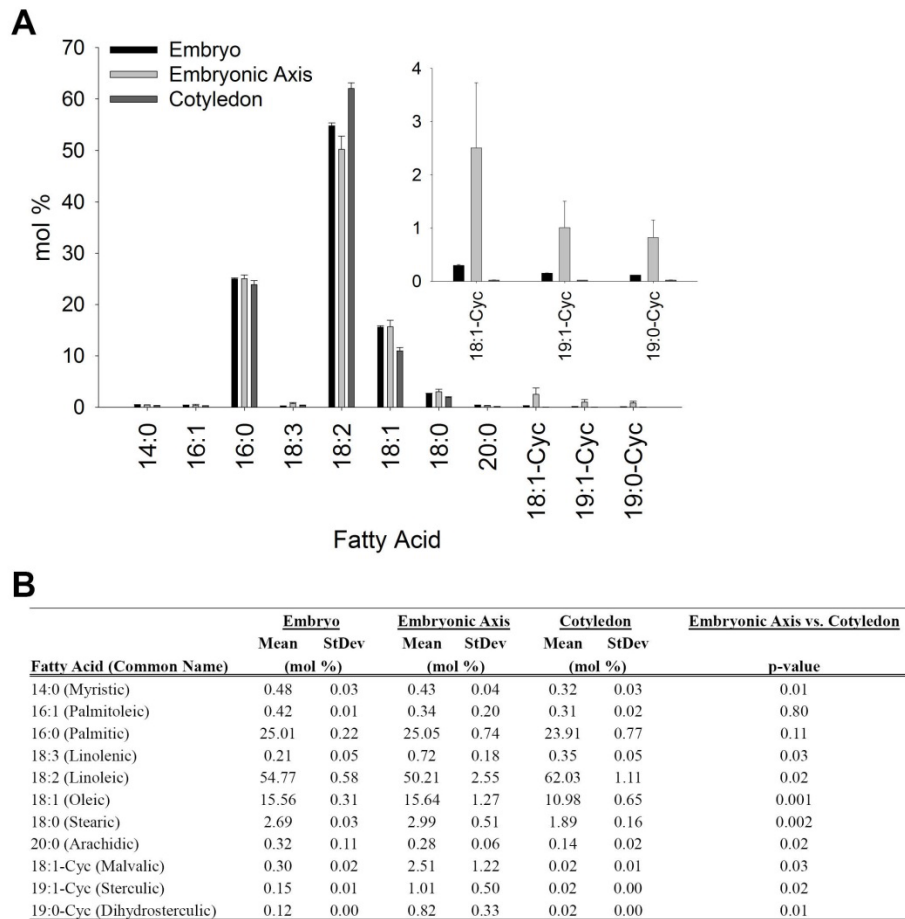

**Supplemental Figure 2.** Fatty acid composition of total cottonseed lipid extracts.

- (A)** Fatty acid composition of total lipids extracted separately from mature (complete) cotton embryos in addition to hand-dissected embryonic axis and cotyledon tissues. The base-catalyzed, fatty acids methyl esters were analyzed by gas chromatography-mass spectrometry. The inset demonstrates the exclusive localization of cyclic fatty acids in the embryonic axis. Fatty acid abbreviations: myristic (14:0), palmitoleic (16:1), palmitic (16:0), linolenic (18:3), linoleic (18:2), oleic (18:1), stearic (18:0), arachidic (20:0), malvalic (18:1-Cyc), sterculic (19:1-Cyc), dihydrosterculic (19:0-Cyc).
- (B)** Table of results from part (A) presented as mean and standard deviation (StDev) mol % of total seed fatty acids ( $n = 3$  to 4 sample replicates with each replicate representing pooled lipid extracts of 5 to 10 embryos or hand-dissected tissues). A student's t-test (two-tailed, unpaired) confirms the embryonic axis and cotyledon tissue comprise of significantly different fatty acid compositions.

**Supplemental Table 1.** Triacylglycerol molecular species analyzed by MALDI-MSI

| Abbreviated Name | Formula   | Adduct(s)                        | Common Name <sup>1,2</sup>                                                     | Cross Section (Na <sup>+</sup> Adducts)                   |                                                                         |                                        |                                                                         |                          |                                        | Longitudinal Section (Na <sup>+</sup> Adducts)                          |                          |                                        |                                                                         |                                                          |                                                                         | Cross Section (K <sup>+</sup> Adducts) |                                                                         |                          |                                        |                                                                         |                          | Longitudinal Section (K <sup>+</sup> Adducts) |                                                                         |                          |                                        |                                                                         |  |
|------------------|-----------|----------------------------------|--------------------------------------------------------------------------------|-----------------------------------------------------------|-------------------------------------------------------------------------|----------------------------------------|-------------------------------------------------------------------------|--------------------------|----------------------------------------|-------------------------------------------------------------------------|--------------------------|----------------------------------------|-------------------------------------------------------------------------|----------------------------------------------------------|-------------------------------------------------------------------------|----------------------------------------|-------------------------------------------------------------------------|--------------------------|----------------------------------------|-------------------------------------------------------------------------|--------------------------|-----------------------------------------------|-------------------------------------------------------------------------|--------------------------|----------------------------------------|-------------------------------------------------------------------------|--|
|                  |           |                                  |                                                                                | [M + Na] <sup>+</sup> Theoretical monoisotopic <i>m/z</i> | Mean error of measured vs. theoretical <i>m/z</i> (in ppm) <sup>3</sup> |                                        |                                                                         | Measured mean <i>m/z</i> | Measured standard deviation <i>m/z</i> | Mean error of measured vs. theoretical <i>m/z</i> (in ppm) <sup>3</sup> | Measured mean <i>m/z</i> | Measured standard deviation <i>m/z</i> | Mean error of measured vs. theoretical <i>m/z</i> (in ppm) <sup>3</sup> | [M + K] <sup>+</sup> Theoretical monoisotopic <i>m/z</i> | Mean error of measured vs. theoretical <i>m/z</i> (in ppm) <sup>3</sup> |                                        |                                                                         | Measured mean <i>m/z</i> | Measured standard deviation <i>m/z</i> | Mean error of measured vs. theoretical <i>m/z</i> (in ppm) <sup>3</sup> | Measured mean <i>m/z</i> | Measured standard deviation <i>m/z</i>        | Mean error of measured vs. theoretical <i>m/z</i> (in ppm) <sup>3</sup> |                          |                                        |                                                                         |  |
|                  |           |                                  |                                                                                |                                                           | Measured mean <i>m/z</i>                                                | Measured standard deviation <i>m/z</i> | Mean error of measured vs. theoretical <i>m/z</i> (in ppm) <sup>3</sup> |                          |                                        |                                                                         |                          |                                        |                                                                         |                                                          | Measured mean <i>m/z</i>                                                | Measured standard deviation <i>m/z</i> | Mean error of measured vs. theoretical <i>m/z</i> (in ppm) <sup>3</sup> |                          |                                        |                                                                         |                          |                                               |                                                                         | Measured mean <i>m/z</i> | Measured standard deviation <i>m/z</i> | Mean error of measured vs. theoretical <i>m/z</i> (in ppm) <sup>3</sup> |  |
| TAG-48:2         | C51H94O6  | Na <sup>+</sup> , K <sup>+</sup> | TAG-MPL-(14:0/16:0/18:2)                                                       | 825.695                                                   | 825.696                                                                 | 0.003                                  | 1.0                                                                     | 825.693                  | 0.004                                  | 1.6                                                                     | 841.669                  | 841.669                                | 0.006                                                                   | 0.6                                                      | 841.670                                                                 | 0.010                                  | 1.9                                                                     |                          |                                        |                                                                         |                          |                                               |                                                                         |                          |                                        |                                                                         |  |
| TAG-48:1         | C51H96O6  | Na <sup>+</sup> , K <sup>+</sup> | TAG-MPO-(14:0/16:0/18:1)                                                       | 827.710                                                   | 827.709                                                                 | 0.006                                  | 1.2                                                                     | 827.709                  | 0.008                                  | 1.7                                                                     | 843.684                  | 843.679                                | 0.011                                                                   | 6.0                                                      | 843.681                                                                 | 0.014                                  | 4.3                                                                     |                          |                                        |                                                                         |                          |                                               |                                                                         |                          |                                        |                                                                         |  |
| TAG-48:0         | C51H98O6  | Na <sup>+</sup> , K <sup>+</sup> | TAG-PPP-(16:0/16:0/16:0)                                                       | 829.726                                                   | 829.730                                                                 | 0.004                                  | 5.2                                                                     | 829.726                  | 0.005                                  | 0.2                                                                     | 845.700                  | 845.697                                | 0.013                                                                   | 3.9                                                      | 845.702                                                                 | 0.013                                  | 1.8                                                                     |                          |                                        |                                                                         |                          |                                               |                                                                         |                          |                                        |                                                                         |  |
| TAG-50:4         | C53H94O6  | Na <sup>+</sup> , K <sup>+</sup> | TAG-MLL-(14:0/18:2/18:2)                                                       | 849.695                                                   | 849.696                                                                 | 0.002                                  | 1.1                                                                     | 849.693                  | 0.004                                  | 1.8                                                                     | 865.669                  | 865.666                                | 0.007                                                                   | 2.8                                                      | 865.677                                                                 | 0.012                                  | 9.4                                                                     |                          |                                        |                                                                         |                          |                                               |                                                                         |                          |                                        |                                                                         |  |
| TAG-50:3         | C53H96O6  | Na <sup>+</sup> , K <sup>+</sup> | TAG-MLO-(14:0/18:2/18:1)                                                       | 851.710                                                   | 851.712                                                                 | 0.002                                  | 2.1                                                                     | 851.710                  | 0.003                                  | 0.4                                                                     | 867.684                  | 867.681                                | 0.009                                                                   | 3.9                                                      | 867.692                                                                 | 0.011                                  | 9.0                                                                     |                          |                                        |                                                                         |                          |                                               |                                                                         |                          |                                        |                                                                         |  |
| TAG-50:2         | C53H98O6  | Na <sup>+</sup> , K <sup>+</sup> | TAG-PPL-(16:0/16:0/18:2)                                                       | 853.726                                                   | 853.728                                                                 | 0.002                                  | 2.0                                                                     | 853.726                  | 0.001                                  | 0.7                                                                     | 869.700                  | 869.695                                | 0.006                                                                   | 6.0                                                      | 869.695                                                                 | 0.005                                  | 5.8                                                                     |                          |                                        |                                                                         |                          |                                               |                                                                         |                          |                                        |                                                                         |  |
| TAG-50:1         | C53H100O6 | Na <sup>+</sup> , K <sup>+</sup> | TAG-PPO-(16:0/16:0/18:1)                                                       | 855.742                                                   | 855.739                                                                 | 0.003                                  | 3.5                                                                     | 855.738                  | 0.003                                  | 4.7                                                                     | 871.716                  | 871.715                                | 0.012                                                                   | 0.4                                                      | 871.714                                                                 | 0.011                                  | 1.4                                                                     |                          |                                        |                                                                         |                          |                                               |                                                                         |                          |                                        |                                                                         |  |
| TAG-52:5         | C55H96O6  | Na <sup>+</sup> , K <sup>+</sup> | TAG-PLLn-(16:0/18:2/18:3)                                                      | 875.710                                                   | 875.712                                                                 | 0.002                                  | 1.7                                                                     | 875.710                  | 0.003                                  | 0.0                                                                     | 891.684                  | 891.676                                | 0.007                                                                   | 9.5                                                      | 891.699                                                                 | 0.009                                  | 16.3                                                                    |                          |                                        |                                                                         |                          |                                               |                                                                         |                          |                                        |                                                                         |  |
| TAG-52:4         | C55H98O6  | Na <sup>+</sup> , K <sup>+</sup> | TAG-PLL-(16:0/18:2/18:2)                                                       | 877.726                                                   | 877.728                                                                 | 0.002                                  | 2.3                                                                     | 877.725                  | 0.001                                  | 0.8                                                                     | 893.700                  | 893.693                                | 0.007                                                                   | 8.1                                                      | 893.691                                                                 | 0.007                                  | 9.9                                                                     |                          |                                        |                                                                         |                          |                                               |                                                                         |                          |                                        |                                                                         |  |
| TAG-52:3         | C55H100O6 | Na <sup>+</sup> , K <sup>+</sup> | TAG-PLo-(16:0/18:2/18:1)                                                       | 879.742                                                   | 879.741                                                                 | 0.002                                  | 0.4                                                                     | 879.740                  | 0.002                                  | 2.3                                                                     | 895.716                  | 895.715                                | 0.013                                                                   | 0.7                                                      | 895.711                                                                 | 0.011                                  | 4.8                                                                     |                          |                                        |                                                                         |                          |                                               |                                                                         |                          |                                        |                                                                         |  |
| TAG-52:2         | C55H102O6 | Na <sup>+</sup> , K <sup>+</sup> | TAG-POO-(16:0/18:1/18:1) > TAG-SLP-(18:0/18:2/16:0)                            | 881.757                                                   | 881.755                                                                 | 0.003                                  | 2.4                                                                     | 881.754                  | 0.003                                  | 4.1                                                                     | 897.731                  | 897.735                                | 0.012                                                                   | 4.0                                                      | 897.729                                                                 | 0.010                                  | 2.5                                                                     |                          |                                        |                                                                         |                          |                                               |                                                                         |                          |                                        |                                                                         |  |
| TAG-54:7         | C57H96O6  | Na <sup>+</sup> , K <sup>+</sup> | TAG-LLLn-(18:2/18:2/18:3)                                                      | 899.710                                                   | 899.711                                                                 | 0.004                                  | 0.5                                                                     | 899.709                  | 0.006                                  | 1.4                                                                     | 915.684                  | 915.677                                | 0.009                                                                   | 7.6                                                      | 915.702                                                                 | 0.004                                  | 19.3                                                                    |                          |                                        |                                                                         |                          |                                               |                                                                         |                          |                                        |                                                                         |  |
| TAG-54:6         | C57H98O6  | Na <sup>+</sup> , K <sup>+</sup> | TAG-LLL-(18:2/18:2/18:2)                                                       | 901.726                                                   | 901.727                                                                 | 0.002                                  | 1.4                                                                     | 901.724                  | 0.001                                  | 1.9                                                                     | 917.700                  | 917.691                                | 0.008                                                                   | 9.4                                                      | 917.689                                                                 | 0.007                                  | 11.7                                                                    |                          |                                        |                                                                         |                          |                                               |                                                                         |                          |                                        |                                                                         |  |
| TAG-54:5         | C57H100O6 | Na <sup>+</sup> , K <sup>+</sup> | TAG-LLO-(18:2/18:2/18:1)                                                       | 903.742                                                   | 903.742                                                                 | 0.002                                  | 0.3                                                                     | 903.739                  | 0.001                                  | 2.9                                                                     | 919.716                  | 919.713                                | 0.012                                                                   | 2.6                                                      | 919.707                                                                 | 0.009                                  | 9.1                                                                     |                          |                                        |                                                                         |                          |                                               |                                                                         |                          |                                        |                                                                         |  |
| TAG-54:4         | C57H102O6 | Na <sup>+</sup> , K <sup>+</sup> | TAG-LOO-(18:2/18:1/18:1) > TAG-SLL-(18:0/18:2/18:2)                            | 905.757                                                   | 905.756                                                                 | 0.002                                  | 1.2                                                                     | 905.754                  | 0.002                                  | 3.7                                                                     | 921.731                  | 921.735                                | 0.013                                                                   | 3.5                                                      | 921.728                                                                 | 0.011                                  | 3.6                                                                     |                          |                                        |                                                                         |                          |                                               |                                                                         |                          |                                        |                                                                         |  |
| TAG-54:3         | C57H104O6 | Na <sup>+</sup> , K <sup>+</sup> | TAG-OOO-(18:1/18:1/18:1) > TAG-SLO-(18:0/18:2/18:1)                            | 907.773                                                   | 907.770                                                                 | 0.004                                  | 3.7                                                                     | 907.768                  | 0.004                                  | 5.3                                                                     | 923.747                  | 923.752                                | 0.011                                                                   | 5.0                                                      | 923.746                                                                 | 0.010                                  | 1.6                                                                     |                          |                                        |                                                                         |                          |                                               |                                                                         |                          |                                        |                                                                         |  |
| TAG-54:2         | C57H106O6 | Na <sup>+</sup> , K <sup>+</sup> | TAG-SOO-(18:0/18:1/18:1) > TAG-ALP-(20:0/18:2/16:0) > TAG-SSL-(18:0/18:0/18:2) | 909.789                                                   | 909.783                                                                 | 0.005                                  | 6.1                                                                     | 909.783                  | 0.006                                  | 6.1                                                                     | 925.763                  | 925.759                                | 0.010                                                                   | 4.1                                                      | 925.760                                                                 | 0.010                                  | 2.8                                                                     |                          |                                        |                                                                         |                          |                                               |                                                                         |                          |                                        |                                                                         |  |
| TAG-54:1         | C57H108O6 | Na <sup>+</sup> , K <sup>+</sup> | TAG-SSO-(18:0/18:0/18:1)                                                       | 911.804                                                   | 911.799                                                                 | 0.007                                  | 5.5                                                                     | 911.803                  | 0.010                                  | 1.4                                                                     | 927.778                  | 927.773                                | 0.011                                                                   | 5.4                                                      | 927.778                                                                 | 0.011                                  | 0.8                                                                     |                          |                                        |                                                                         |                          |                                               |                                                                         |                          |                                        |                                                                         |  |
| TAG-56:4         | C59H106O6 | Na <sup>+</sup> , K <sup>+</sup> | TAG-ALL-(20:0/18:2/18:2)/GLO-(20:1/18:2/18:1)                                  | 933.789                                                   | 933.785                                                                 | 0.004                                  | 4.4                                                                     | 933.785                  | 0.007                                  | 4.0                                                                     | 949.763                  | 949.761                                | 0.015                                                                   | 1.4                                                      | 949.765                                                                 | 0.011                                  | 2.2                                                                     |                          |                                        |                                                                         |                          |                                               |                                                                         |                          |                                        |                                                                         |  |
| TAG-56:3         | C59H108O6 | Na <sup>+</sup> , K <sup>+</sup> | TAG-ALO-(20:0/18:2/18:1)                                                       | 935.804                                                   | 935.797                                                                 | 0.006                                  | 7.7                                                                     | 935.801                  | 0.009                                  | 3.4                                                                     | 951.778                  | 951.774                                | 0.013                                                                   | 4.6                                                      | 951.780                                                                 | 0.012                                  | 1.9                                                                     |                          |                                        |                                                                         |                          |                                               |                                                                         |                          |                                        |                                                                         |  |
| TAG-56:2         | C59H110O6 | Na <sup>+</sup> , K <sup>+</sup> | TAG-AOO-(20:0/18:1/18:1)                                                       | 937.820                                                   | 937.818                                                                 | 0.006                                  | 2.2                                                                     | 937.817                  | 0.010                                  | 3.0                                                                     | 953.794                  | 953.792                                | 0.009                                                                   | 2.4                                                      | 953.793                                                                 | 0.011                                  | 0.8                                                                     |                          |                                        |                                                                         |                          |                                               |                                                                         |                          |                                        |                                                                         |  |
| TAG-58:4         | C61H110O6 | Na <sup>+</sup> , K <sup>+</sup> | TAG-BLL-(22:0/18:2/18:2)                                                       | 961.820                                                   | 961.821                                                                 | 0.006                                  | 1.2                                                                     | 961.819                  | 0.010                                  | 1.5                                                                     | 977.794                  | 977.792                                | 0.011                                                                   | 2.0                                                      | 977.791                                                                 | 0.012                                  | 2.7                                                                     |                          |                                        |                                                                         |                          |                                               |                                                                         |                          |                                        |                                                                         |  |
| TAG-53:3-Cyc     | C56H100O6 | Na <sup>+</sup> , K <sup>+</sup> | TAG-LScP                                                                       | 891.742                                                   | 891.739                                                                 | 0.005                                  | 3.0                                                                     | 891.739                  | 0.005                                  | 2.6                                                                     | 907.716                  | 907.709                                | 0.006                                                                   | 6.9                                                      | 907.707                                                                 | 0.006                                  | 10.1                                                                    |                          |                                        |                                                                         |                          |                                               |                                                                         |                          |                                        |                                                                         |  |
| TAG-53:2-Cyc     | C56H102O6 | Na <sup>+</sup> , K <sup>+</sup> | TAG-LDscP (OScP)                                                               | 893.757                                                   | 893.748                                                                 | 0.006                                  | 10.3                                                                    | 893.747                  | 0.006                                  | 11.4                                                                    | 909.731                  | 909.726                                | 0.008                                                                   | 5.4                                                      | 909.725                                                                 | 0.004                                  | 7.3                                                                     |                          |                                        |                                                                         |                          |                                               |                                                                         |                          |                                        |                                                                         |  |
| TAG-53:1-Cyc     | C56H104O6 | Na <sup>+</sup> , K <sup>+</sup> | TAG-ODScP                                                                      | 895.773                                                   | 895.764                                                                 | 0.007                                  | 9.8                                                                     | 895.762                  | 0.006                                  | 12.1                                                                    | 911.747                  | 911.738                                | 0.007                                                                   | 9.4                                                      | 911.735                                                                 | 0.004                                  | 13.6                                                                    |                          |                                        |                                                                         |                          |                                               |                                                                         |                          |                                        |                                                                         |  |
| TAG-55:5-Cyc     | C58H100O6 | Na <sup>+</sup> , K <sup>+</sup> | TAG-LLSc                                                                       | 915.742                                                   | 915.738                                                                 | 0.008                                  | 4.3                                                                     | 915.737                  | 0.007                                  | 5.2                                                                     | 931.716                  | 931.709                                | 0.007                                                                   | 7.0                                                      | 931.705                                                                 | 0.006                                  | 11.1                                                                    |                          |                                        |                                                                         |                          |                                               |                                                                         |                          |                                        |                                                                         |  |
| TAG-55:4-Cyc     | C58H102O6 | Na <sup>+</sup> , K <sup>+</sup> | TAG-LLDsc > OLSc                                                               | 917.757                                                   | 917.749                                                                 | 0.007                                  | 9.7                                                                     | 917.741                  | 0.004                                  | 18.2                                                                    | 933.731                  | 933.725                                | 0.007                                                                   | 6.5                                                      | 933.725                                                                 | 0.004                                  | 7.0                                                                     |                          |                                        |                                                                         |                          |                                               |                                                                         |                          |                                        |                                                                         |  |
| TAG-55:3-Cyc     | C58H104O6 | Na <sup>+</sup> , K <sup>+</sup> | TAG-LODsc > OOSc                                                               | 919.773                                                   | 919.761                                                                 | 0.003                                  | 13.4                                                                    | 919.758                  | 0.006                                  | 16.1                                                                    | 935.747                  | 935.739                                | 0.008                                                                   | 8.2                                                      | 935.738                                                                 | 0.004                                  | 10.0                                                                    |                          |                                        |                                                                         |                          |                                               |                                                                         |                          |                                        |                                                                         |  |
| TAG-56:5-Cyc     | C59H102O6 | Na <sup>+</sup> , K <sup>+</sup> | TAG-LScSc >> LnDScSc                                                           | 929.757                                                   | 929.747                                                                 | 0.004                                  | 11.7                                                                    | 929.746                  | 0.009                                  | 12.2                                                                    | 945.731                  | 945.723                                | 0.010                                                                   | 8.8                                                      | 945.730                                                                 | 0.011                                  | 1.9                                                                     |                          |                                        |                                                                         |                          |                                               |                                                                         |                          |                                        |                                                                         |  |
| TAG-56:4-Cyc     | C59H104O6 | Na <sup>+</sup> , K <sup>+</sup> | LDscSc > LnDscDsc                                                              | 931.773                                                   | 931.771                                                                 | 0.008                                  | 2.6                                                                     | 931.772                  | 0.010                                  | 1.3                                                                     | 947.747                  | 947.754                                | 0.011                                                                   | 7.5                                                      | 947.749                                                                 | 0.012                                  | 1.8                                                                     |                          |                                        |                                                                         |                          |                                               |                                                                         |                          |                                        |                                                                         |  |
| TAG-56:3-Cyc     | C59H106O6 | Na <sup>+</sup> , K <sup>+</sup> | LDscDsc                                                                        | 933.789                                                   | 933.785                                                                 | 0.004                                  | 4.4                                                                     | 933.785                  | 0.007                                  | 4.0                                                                     | 949.763                  | 949.761                                | 0.015                                                                   | 1.4                                                      | 949.765                                                                 | 0.011                                  | 2.2                                                                     |                          |                                        |                                                                         |                          |                                               |                                                                         |                          |                                        |                                                                         |  |

<sup>1</sup> Determined from ESI-MS/MS and literature<sup>2</sup> Fatty Acid Abbreviations: M-14:0 Myristic; P-16:0 palmitic; Po-16:1 palmitoleic, Ln-18:3 linolenic; L-18:2 linoleic; O-18:1 oleic acid; S-18:0 stearic; A-20:0 arachidic; B-22:0 behenic; Sc-19:1 sterculic; Dsc-19:0 dihydrosterculic acid<sup>3</sup> PPM = parts per million; ( |measured mean *m/z* - theoretical monoisotopic *m/z* | / theoretical monoisotopic *m/z* \* 10<sup>6</sup> )

**Supplemental Table 2.** Phosphatidylcholine molecular species analyzed by MALDI-MSI

| Abbreviated Name    | Formula    | Adduct(s)                                         | Common Name <sup>1,2</sup>                 | Cross Section (H <sup>+</sup> Adducts)            |                   |                                                   | Longitudinal Section (H <sup>+</sup> Adducts)                    |                   |                                 | Cross Section (K <sup>+</sup> Adducts)                           |                                                   |                   | Longitudinal Section (K <sup>+</sup> Adducts) |                                                                  |                   | Cross Section (Na <sup>+</sup> Adducts) |                                                                  |                                                    | Longitudinal Section (Na <sup>+</sup> Adducts) |                                 |                                                                  |                   |                                 |                                                                  |
|---------------------|------------|---------------------------------------------------|--------------------------------------------|---------------------------------------------------|-------------------|---------------------------------------------------|------------------------------------------------------------------|-------------------|---------------------------------|------------------------------------------------------------------|---------------------------------------------------|-------------------|-----------------------------------------------|------------------------------------------------------------------|-------------------|-----------------------------------------|------------------------------------------------------------------|----------------------------------------------------|------------------------------------------------|---------------------------------|------------------------------------------------------------------|-------------------|---------------------------------|------------------------------------------------------------------|
|                     |            |                                                   |                                            | [M + H] <sup>+</sup> Theoretical monoisotopic m/z | Measured mean m/z | Measured standard deviation m/z                   | Mean error of measured vs. theoretical m/z (in ppm) <sup>3</sup> | Measured mean m/z | Measured standard deviation m/z | Mean error of measured vs. theoretical m/z (in ppm) <sup>3</sup> | [M + K] <sup>+</sup> Theoretical monoisotopic m/z | Measured mean m/z | Measured standard deviation m/z               | Mean error of measured vs. theoretical m/z (in ppm) <sup>3</sup> | Measured mean m/z | Measured standard deviation m/z         | Mean error of measured vs. theoretical m/z (in ppm) <sup>3</sup> | [M + Na] <sup>+</sup> Theoretical monoisotopic m/z | Measured mean m/z                              | Measured standard deviation m/z | Mean error of measured vs. theoretical m/z (in ppm) <sup>3</sup> | Measured mean m/z | Measured standard deviation m/z | Mean error of measured vs. theoretical m/z (in ppm) <sup>3</sup> |
|                     |            |                                                   |                                            | LysoPC-16:1                                       | C24H48O7PN        | H <sup>+</sup> , Na <sup>+</sup> , K <sup>+</sup> | PC(16:1/0:0)                                                     | 494.325           | 494.324                         | 0.002                                                            | 1.5                                               | 494.323           | 0.009                                         | 3.0                                                              | 532.281           | 532.280                                 | 0.004                                                            | 1.0                                                | 532.279                                        | 0.008                           | 3.4                                                              | 516.307           | 516.305                         | 0.005                                                            |
| LysoPC-16:0         | C24H50O7PN | H <sup>+</sup> , Na <sup>+</sup> , K <sup>+</sup> | PC(16:0/0:0)                               | 496.340                                           | 496.340           | 0.001                                             | 1.4                                                              | 496.338           | 0.001                           | 3.6                                                              | 534.296                                           | 534.296           | 0.001                                         | 1.2                                                              | 534.296           | 0.005                                   | 0.6                                                              | 518.322                                            | 518.322                                        | 0.001                           | 0.7                                                              | 518.321           | 0.005                           | 3.4                                                              |
| LysoPC-18:3         | C26H48O7PN | H <sup>+</sup> , Na <sup>+</sup> , K <sup>+</sup> | PC(18:3/0:0)                               | 518.325                                           | 518.322           | 0.001                                             | 5.4                                                              | 518.321           | 0.005                           | 6.7                                                              | 556.281                                           | 556.272           | 0.006                                         | 15.1                                                             | 556.280           | 0.008                                   | 0.9                                                              | 540.307                                            | 540.304                                        | 0.007                           | 5.4                                                              | 540.308           | 0.007                           | 1.9                                                              |
| LysoPC-18:2         | C26H50O7PN | H <sup>+</sup> , Na <sup>+</sup> , K <sup>+</sup> | PC(18:2/0:0)                               | 520.340                                           | 520.340           | 0.001                                             | 1.3                                                              | 520.338           | 0.001                           | 3.5                                                              | 558.296                                           | 558.296           | 0.001                                         | 1.2                                                              | 558.294           | 0.004                                   | 3.2                                                              | 542.322                                            | 542.321                                        | 0.001                           | 1.5                                                              | 542.320           | 0.004                           | 3.8                                                              |
| LysoPC-18:1         | C26H52O7PN | H <sup>+</sup> , Na <sup>+</sup> , K <sup>+</sup> | PC(18:1/0:0)                               | 522.356                                           | 522.356           | 0.001                                             | 0.3                                                              | 522.355           | 0.001                           | 2.6                                                              | 560.312                                           | 560.312           | 0.002                                         | 0.2                                                              | 560.310           | 0.007                                   | 3.9                                                              | 544.338                                            | 544.338                                        | 0.001                           | 0.2                                                              | 544.336           | 0.006                           | 4.0                                                              |
| LysoPC-18:0         | C26H54O7PN | H <sup>+</sup> , Na <sup>+</sup> , K <sup>+</sup> | PC(18:0/0:0)                               | 524.372                                           | 524.372           | 0.002                                             | 0.8                                                              | 524.370           | 0.005                           | 2.9                                                              | 562.328                                           | 562.330           | 0.006                                         | 3.6                                                              | 562.329           | 0.009                                   | 3.2                                                              | 546.354                                            | 546.353                                        | 0.003                           | 0.3                                                              | 546.353           | 0.009                           | 0.1                                                              |
| PC-32:2             | C40H78O8PN | H <sup>+</sup> , Na <sup>+</sup> , K <sup>+</sup> | PC(14:0/18:2)                              | 730.539                                           | 730.539           | 0.002                                             | 0.2                                                              | 730.537           | 0.003                           | 2.2                                                              | 768.495                                           | 768.495           | 0.002                                         | 0.2                                                              | 768.495           | 0.007                                   | 0.1                                                              | 752.521                                            | 752.519                                        | 0.002                           | 1.5                                                              | 752.517           | 0.003                           | 4.9                                                              |
| PC-32:1             | C40H78O8PN | H <sup>+</sup> , Na <sup>+</sup> , K <sup>+</sup> | PC(14:0/18:1)                              | 732.554                                           | 732.555           | 0.002                                             | 1.0                                                              | 732.552           | 0.005                           | 2.5                                                              | 770.510                                           | 770.512           | 0.003                                         | 2.3                                                              | 770.519           | 0.007                                   | 11.9                                                             | 754.536                                            | 754.536                                        | 0.003                           | 0.7                                                              | 754.533           | 0.005                           | 4.2                                                              |
| PC-32:0             | C40H80O8PN | H <sup>+</sup> , Na <sup>+</sup> , K <sup>+</sup> | Not Identified                             | 734.570                                           | 734.571           | 0.002                                             | 1.0                                                              | 734.569           | 0.005                           | 1.7                                                              | 772.526                                           | 772.528           | 0.002                                         | 2.2                                                              | 772.525           | 0.007                                   | 0.9                                                              | 756.552                                            | 756.555                                        | 0.002                           | 3.5                                                              | 756.552           | 0.003                           | 0.6                                                              |
| PC-34:3             | C42H80O8PN | H <sup>+</sup> , Na <sup>+</sup> , K <sup>+</sup> | PC(16:0/18:3)                              | 756.554                                           | 756.555           | 0.002                                             | 0.3                                                              | 756.552           | 0.003                           | 2.5                                                              | 794.510                                           | 794.510           | 0.002                                         | 0.3                                                              | 794.509           | 0.007                                   | 0.9                                                              | 778.536                                            | 778.536                                        | 0.002                           | 0.8                                                              | 778.535           | 0.006                           | 2.0                                                              |
| PC-34:2             | C42H80O8PN | H <sup>+</sup> , Na <sup>+</sup> , K <sup>+</sup> | PC(16:0/18:2)                              | 758.570                                           | 758.571           | 0.001                                             | 1.4                                                              | 758.568           | 0.001                           | 2.2                                                              | 796.526                                           | 796.527           | 0.001                                         | 1.4                                                              | 796.524           | 0.001                                   | 2.0                                                              | 780.552                                            | 780.553                                        | 0.001                           | 2.0                                                              | 780.551           | 0.001                           | 1.7                                                              |
| PC-34:1             | C42H82O8PN | H <sup>+</sup> , Na <sup>+</sup> , K <sup>+</sup> | PC(16:0/18:1)                              | 760.586                                           | 760.585           | 0.002                                             | 1.4                                                              | 760.584           | 0.001                           | 2.2                                                              | 798.542                                           | 798.542           | 0.002                                         | 0.2                                                              | 798.542           | 0.002                                   | 0.0                                                              | 782.568                                            | 782.571                                        | 0.002                           | 3.8                                                              | 782.568           | 0.001                           | 0.8                                                              |
| PC-35:1-Cyc         | C43H82O8PN | H <sup>+</sup> , Na <sup>+</sup> , K <sup>+</sup> | PC-Cyc-PSc                                 | 772.586                                           | 772.586           | 0.001                                             | 0.9                                                              | 772.585           | 0.004                           | 1.3                                                              | 810.542                                           | 810.544           | 0.003                                         | 2.5                                                              | 810.540           | 0.007                                   | 2.3                                                              | 794.568                                            | 794.569                                        | 0.005                           | 1.9                                                              | 794.566           | 0.007                           | 2.3                                                              |
| PC-35:0-Cyc         | C43H84O8PN | H <sup>+</sup> , Na <sup>+</sup> , K <sup>+</sup> | PC-Cyc-PDSc                                | 774.601                                           | 774.600           | 0.004                                             | 1.2                                                              | 774.600           | 0.006                           | 2.1                                                              | 812.557                                           | 812.559           | 0.005                                         | 2.0                                                              | 812.557           | 0.008                                   | 0.5                                                              | 796.583                                            | 796.582                                        | 0.002                           | 1.8                                                              | 796.584           | 0.005                           | 0.4                                                              |
| PC-36:6             | C44H76O8PN | H <sup>+</sup> , Na <sup>+</sup> , K <sup>+</sup> | PC(18:3/18:3)                              | 778.539                                           | 778.536           | 0.002                                             | 3.9                                                              | 778.536           | 0.006                           | 3.8                                                              | 816.493                                           | 816.493           | 0.009                                         | 2.3                                                              | 816.493           | 0.009                                   | 1.7                                                              | 800.521                                            | 800.524                                        | 0.008                           | 4.5                                                              | 800.528           | 0.007                           | 9.4                                                              |
| PC-36:5             | C44H78O8PN | H <sup>+</sup> , Na <sup>+</sup> , K <sup>+</sup> | PC(18:3/18:2)                              | 780.554                                           | 780.553           | 0.001                                             | 1.1                                                              | 780.551           | 0.001                           | 4.8                                                              | 818.510                                           | 818.510           | 0.002                                         | 0.4                                                              | 818.511           | 0.009                                   | 0.7                                                              | 802.536                                            | 802.537                                        | 0.004                           | 0.3                                                              | 802.536           | 0.008                           | 0.2                                                              |
| PC-36:4             | C44H80O8PN | H <sup>+</sup> , Na <sup>+</sup> , K <sup>+</sup> | PC(18:2/18:2),PC(18:1/18:3)                | 782.570                                           | 782.571           | 0.002                                             | 0.7                                                              | 782.568           | 0.001                           | 2.2                                                              | 820.526                                           | 820.527           | 0.001                                         | 0.9                                                              | 820.524           | 0.001                                   | 2.1                                                              | 804.552                                            | 804.553                                        | 0.001                           | 1.1                                                              | 804.550           | 0.001                           | 2.0                                                              |
| PC-36:3             | C44H82O8PN | H <sup>+</sup> , Na <sup>+</sup> , K <sup>+</sup> | PC(18:1/18:2),PC(18:0/18:3)                | 784.586                                           | 784.586           | 0.002                                             | 0.1                                                              | 784.584           | 0.001                           | 1.9                                                              | 822.542                                           | 822.541           | 0.001                                         | 0.1                                                              | 822.541           | 0.001                                   | 0.9                                                              | 806.568                                            | 806.567                                        | 0.003                           | 0.9                                                              | 806.566           | 0.001                           | 2.0                                                              |
| PC-36:2             | C44H84O8PN | H <sup>+</sup> , Na <sup>+</sup> , K <sup>+</sup> | PC(18:0/18:2),PC(18:1/18:1)                | 786.601                                           | 786.600           | 0.002                                             | 1.2                                                              | 786.600           | 0.001                           | 2.2                                                              | 824.557                                           | 824.557           | 0.002                                         | 0.0                                                              | 824.557           | 0.002                                   | 0.2                                                              | 808.583                                            | 808.582                                        | 0.003                           | 2.0                                                              | 808.581           | 0.002                           | 2.3                                                              |
| PC-36:1             | C44H86O8PN | H <sup>+</sup> , Na <sup>+</sup> , K <sup>+</sup> | PC(18:0/18:0)                              | 788.617                                           | 788.612           | 0.002                                             | 5.7                                                              | 788.612           | 0.004                           | 6.1                                                              | 826.573                                           | 826.569           | 0.004                                         | 4.1                                                              | 826.570           | 0.006                                   | 3.7                                                              | 810.599                                            | 810.596                                        | 0.004                           | 3.4                                                              | 810.595           | 0.005                           | 4.2                                                              |
| PC-37:3-Cyc         | C45H82O8PN | H <sup>+</sup> , Na <sup>+</sup> , K <sup>+</sup> | PC-Cyc-LSc                                 | 796.586                                           | 796.582           | 0.002                                             | 4.8                                                              | 796.584           | 0.005                           | 2.1                                                              | 834.542                                           | 834.542           | 0.003                                         | 0.5                                                              | 834.540           | 0.007                                   | 1.5                                                              | 818.568                                            | 818.568                                        | 0.004                           | 0.2                                                              | 818.569           | 0.008                           | 2.2                                                              |
| PC-37:2-Cyc         | C45H84O8PN | H <sup>+</sup> , Na <sup>+</sup> , K <sup>+</sup> | PC-Cyc-LDsc,OSc                            | 798.601                                           | 798.597           | 0.003                                             | 5.2                                                              | 798.599           | 0.004                           | 2.3                                                              | 836.557                                           | 836.557           | 0.003                                         | 0.3                                                              | 836.556           | 0.005                                   | 1.6                                                              | 820.583                                            | 820.580                                        | 0.011                           | 4.0                                                              | 820.583           | 0.006                           | 0.5                                                              |
| PC-37:1-Cyc         | C45H86O8PN | H <sup>+</sup> , Na <sup>+</sup> , K <sup>+</sup> | PC-Cyc-ODsc                                | 800.617                                           | 800.614           | 0.004                                             | 4.2                                                              | 800.615           | 0.005                           | 2.4                                                              | 838.573                                           | 838.574           | 0.005                                         | 1.3                                                              | 838.572           | 0.007                                   | 1.5                                                              | 822.599                                            | 822.597                                        | 0.007                           | 2.3                                                              | 822.597           | 0.008                           | 1.9                                                              |
| PC-38:4-PC-38:2-Cyc | C46H84O8PN | H <sup>+</sup> , Na <sup>+</sup> , K <sup>+</sup> | PC(20:1/18:3), PC(20:2/18:2), PC-Cyc-ScSc  | 810.601                                           | 810.596           | 0.004                                             | 6.3                                                              | 810.596           | 0.005                           | 6.7                                                              | 848.557                                           | 848.555           | 0.008                                         | 2.4                                                              | 848.552           | 0.007                                   | 6.4                                                              | 832.583                                            | 832.572                                        | 0.003                           | 13.7                                                             | 832.583           | 0.008                           | 0.8                                                              |
| PC-38:3-PC-38:1-Cyc | C46H86O8PN | H <sup>+</sup> , Na <sup>+</sup> , K <sup>+</sup> | PC(20:1/18:2), PC(20:0/18:3), PC-Cyc-ScDsc | 812.617                                           | 812.617           | 0.005                                             | 0.3                                                              | 812.617           | 0.007                           | 0.1                                                              | 850.573                                           | 850.573           | 0.004                                         | 0.1                                                              | 850.576           | 0.007                                   | 3.3                                                              | 834.599                                            | 834.600                                        | 0.007                           | 0.8                                                              | 834.600           | 0.010                           | 1.9                                                              |
| PC-38:2-PC-38:0-Cyc | C46H88O8PN | H <sup>+</sup> , Na <sup>+</sup> , K <sup>+</sup> | Not Identified_PC-Cyc-DscDsc               | 814.633                                           | 814.632           | 0.002                                             | 0.3                                                              | 814.631           | 0.005                           | 2.1                                                              | 852.588                                           | 852.589           | 0.003                                         | 0.2                                                              | 852.586           | 0.009                                   | 3.3                                                              | 836.615                                            | 836.616                                        | 0.004                           | 1.5                                                              | 836.616           | 0.007                           | 1.2                                                              |

<sup>1</sup>Determined from ESI-MS/MS and literature

<sup>2</sup>Fatty Acid Abbreviations: M-14:0 Myristic; P-16:0 palmitic; Po-16:1 palmitoleic, Ln-18:3 linolenic; L-18:2 linoleic; O-18:1 oleic acid; S-18:0 stearic; A-20:0 arachidic; B-22:0 behenic; Sc-19:1 sterculic; Dsc-19:0 dihydrosterculic acid

<sup>3</sup>PPM = parts per million; (|measured mean m/z - theoretical monoisotopic m/z| / theoretical monoisotopic m/z \* 10<sup>6</sup>)

**Supplemental Table 3.** Phosphatidylethanolamine molecular species analyzed by MALDI-MSI

| Abbreviated Name | Formula    | Adduct(s)                                         | Common Name <sup>1,2</sup> | Cross Section (H <sup>+</sup> Adducts)            |                   |                                 | Longitudinal Section (H <sup>+</sup> Adducts)                    |                   |                                 | Cross Section (K <sup>+</sup> Adducts)                           |                                                   |                   | Longitudinal Section (K <sup>+</sup> Adducts) |                                                                  |                   | Cross Section (Na <sup>+</sup> Adducts) |                                                                  |                                                    | Longitudinal Section (Na <sup>+</sup> Adducts) |                                 |                                                                  |                   |                                 |                                                                  |
|------------------|------------|---------------------------------------------------|----------------------------|---------------------------------------------------|-------------------|---------------------------------|------------------------------------------------------------------|-------------------|---------------------------------|------------------------------------------------------------------|---------------------------------------------------|-------------------|-----------------------------------------------|------------------------------------------------------------------|-------------------|-----------------------------------------|------------------------------------------------------------------|----------------------------------------------------|------------------------------------------------|---------------------------------|------------------------------------------------------------------|-------------------|---------------------------------|------------------------------------------------------------------|
|                  |            |                                                   |                            | [M + H] <sup>+</sup> Theoretical monoisotopic m/z | Measured mean m/z | Measured standard deviation m/z | Mean error of measured vs. theoretical m/z (in ppm) <sup>3</sup> | Measured mean m/z | Measured standard deviation m/z | Mean error of measured vs. theoretical m/z (in ppm) <sup>3</sup> | [M + K] <sup>+</sup> Theoretical monoisotopic m/z | Measured mean m/z | Measured standard deviation m/z               | Mean error of measured vs. theoretical m/z (in ppm) <sup>3</sup> | Measured mean m/z | Measured standard deviation m/z         | Mean error of measured vs. theoretical m/z (in ppm) <sup>3</sup> | [M + Na] <sup>+</sup> Theoretical monoisotopic m/z | Measured mean m/z                              | Measured standard deviation m/z | Mean error of measured vs. theoretical m/z (in ppm) <sup>3</sup> | Measured mean m/z | Measured standard deviation m/z | Mean error of measured vs. theoretical m/z (in ppm) <sup>3</sup> |
| LysoPE-16:0      | C21H44O7PN | H <sup>+</sup> , K <sup>+</sup> , Na <sup>+</sup> | PE(16:0/0:0)               | 454.293                                           | 454.297           | 0.006                           | 7.3                                                              | 454.292           | 0.009                           | 3.4                                                              | 492.249                                           | 492.247           | 0.007                                         | 3.8                                                              | 492.249           | 0.011                                   | 1.2                                                              | 476.275                                            | 476.275                                        | 0.005                           | 1.2                                                              | 476.274           | 0.011                           | 2.2                                                              |
| LysoPE-18:3      | C23H42O7PN | H <sup>+</sup> , K <sup>+</sup> , Na <sup>+</sup> | PE(18:3/0:0)               | 476.278                                           | 476.275           | 0.005                           | 5.4                                                              | 476.277           | 0.012                           | 2.2                                                              | 514.234                                           | 514.226           | 0.009                                         | 14.9                                                             | 514.229           | 0.012                                   | 9.5                                                              | 498.260                                            | 498.256                                        | 0.009                           | 6.7                                                              | 498.262           | 0.011                           | 4.6                                                              |
| LysoPE-18:2      | C23H44O7PN | H <sup>+</sup> , K <sup>+</sup> , Na <sup>+</sup> | PE(18:2/0:0)               | 478.293                                           | 478.293           | 0.002                           | 1.0                                                              | 478.292           | 0.008                           | 2.3                                                              | 516.249                                           | 516.248           | 0.007                                         | 1.5                                                              | 516.248           | 0.012                                   | 1.7                                                              | 500.275                                            | 500.275                                        | 0.004                           | 1.5                                                              | 500.275           | 0.013                           | 1.5                                                              |
| LysoPE-18:1      | C23H46O7PN | H <sup>+</sup> , K <sup>+</sup> , Na <sup>+</sup> | PE(18:1/0:0)               | 480.309                                           | 480.309           | 0.007                           | 0.8                                                              | 480.309           | 0.011                           | 1.0                                                              | 518.265                                           | 518.270           | 0.012                                         | 10.4                                                             | 518.263           | 0.012                                   | 3.9                                                              | 502.291                                            | 502.294                                        | 0.011                           | 6.4                                                              | 502.292           | 0.011                           | 2.8                                                              |
| PE-34:2          | C39H74O8PN | H <sup>+</sup> , K <sup>+</sup> , Na <sup>+</sup> | PE(18:2/16:0)              | 716.523                                           | 716.523           | 0.001                           | 0.3                                                              | 716.521           | 0.002                           | 2.3                                                              | 754.479                                           | 754.480           | 0.001                                         | 1.3                                                              | 754.477           | 0.002                                   | 1.9                                                              | 738.505                                            | 738.505                                        | 0.001                           | 0.3                                                              | 738.504           | 0.002                           | 2.0                                                              |
| PE-34:1          | C39H76O8PN | H <sup>+</sup> , K <sup>+</sup> , Na <sup>+</sup> | PE(18:1/16:0)              | 718.539                                           | 718.536           | 0.006                           | 4.4                                                              | 718.536           | 0.007                           | 4.1                                                              | 756.495                                           | 756.493           | 0.008                                         | 1.9                                                              | 756.493           | 0.008                                   | 1.8                                                              | 740.521                                            | 740.524                                        | 0.002                           | 4.1                                                              | 740.522           | 0.003                           | 1.3                                                              |
| PE-36:5          | C41H72O8PN | H <sup>+</sup> , K <sup>+</sup> , Na <sup>+</sup> | PE(18:3/18:2)              | 738.507                                           | 738.505           | 0.002                           | 3.0                                                              | 738.504           | 0.002                           | 5.2                                                              | 776.463                                           | 776.462           | 0.002                                         | 1.5                                                              | 776.460           | 0.004                                   | 4.7                                                              | 760.489                                            | 760.489                                        | 0.002                           | 0.4                                                              | 760.486           | 0.005                           | 3.8                                                              |
| PE-36:4          | C41H74O8PN | H <sup>+</sup> , K <sup>+</sup> , Na <sup>+</sup> | PE(18:2/18:2)              | 740.523                                           | 740.524           | 0.002                           | 0.8                                                              | 740.522           | 0.003                           | 1.9                                                              | 778.479                                           | 778.480           | 0.001                                         | 1.7                                                              | 778.477           | 0.003                                   | 1.9                                                              | 762.505                                            | 762.505                                        | 0.002                           | 0.2                                                              | 762.503           | 0.003                           | 2.1                                                              |
| PE-36:3          | C41H76O8PN | H <sup>+</sup> , K <sup>+</sup> , Na <sup>+</sup> | PE(18:2/18:1)              | 742.539                                           | 742.539           | 0.004                           | 0.4                                                              | 742.537           | 0.006                           | 1.9                                                              | 780.495                                           | 780.500           | 0.004                                         | 6.7                                                              | 780.493           | 0.005                                   | 1.5                                                              | 764.521                                            | 764.519                                        | 0.003                           | 1.5                                                              | 764.519           | 0.006                           | 2.4                                                              |
| PE-36:2          | C41H78O8PN | H <sup>+</sup> , K <sup>+</sup> , Na <sup>+</sup> | PE(18:1/18:1, 18:2/18:0)   | 744.554                                           | 744.555           | 0.004                           | 0.9                                                              | 744.552           | 0.009                           | 3.6                                                              | 782.510                                           | 782.518           | 0.007                                         | 10.2                                                             | 782.511           | 0.011                                   | 1.2                                                              | 766.536                                            | 766.536                                        | 0.006                           | 0.1                                                              | 766.534           | 0.010                           | 2.8                                                              |
| PE-36:1          | C41H80O8PN | H <sup>+</sup> , K <sup>+</sup> , Na <sup>+</sup> | PE(18:1/18:0)              | 746.570                                           | 746.572           | 0.007                           | 2.6                                                              | 746.573           | 0.013                           | 3.7                                                              | 784.526                                           | 784.532           | 0.005                                         | 7.6                                                              | 784.524           | 0.011                                   | 2.2                                                              | 768.552                                            | 768.554                                        | 0.005                           | 2.7                                                              | 768.550           | 0.011                           | 2.7                                                              |

<sup>1</sup>Determined from ESI-MS/MS and literature<sup>2</sup>Fatty Acid Abbreviations: M-14:0 Myristic; P-16:0 palmitic; Po-16:1 palmitoleic, Ln-18:3 linolenic; L-18:2 linoleic; O-18:1 oleic acid; S-18:0 stearic; A-20:0 arachidic; B-22:0 behenic; Sc-19:1 sterculic; Dsc-19:0 dihydrosterculic acid<sup>3</sup>PPM = parts per million; (|measured mean m/z - theoretical monoisotopic m/z| / theoretical monoisotopic m/z \* 10<sup>6</sup>)

**Supplemental Table 4.** Phosphatidic acid molecular species analyzed by MALDI-MSI

| Abbreviated Name | Formula   | Adduct(s)                        | Common Name <sup>1,2</sup> | Cross Section (Na <sup>+</sup> Adducts)                   |                          |                                        | Longitudinal Section (Na <sup>+</sup> Adducts)                          |                          |                                        | Cross Section (K <sup>+</sup> Adducts)                                  |                                                          |                          | Longitudinal Section (K <sup>+</sup> Adducts) |                                                                         |                          |                                        |                                                                         |
|------------------|-----------|----------------------------------|----------------------------|-----------------------------------------------------------|--------------------------|----------------------------------------|-------------------------------------------------------------------------|--------------------------|----------------------------------------|-------------------------------------------------------------------------|----------------------------------------------------------|--------------------------|-----------------------------------------------|-------------------------------------------------------------------------|--------------------------|----------------------------------------|-------------------------------------------------------------------------|
|                  |           |                                  |                            | [M + Na] <sup>+</sup> Theoretical monoisotopic <i>m/z</i> | Measured mean <i>m/z</i> | Measured standard deviation <i>m/z</i> | Mean error of measured vs. theoretical <i>m/z</i> (in ppm) <sup>3</sup> | Measured mean <i>m/z</i> | Measured standard deviation <i>m/z</i> | Mean error of measured vs. theoretical <i>m/z</i> (in ppm) <sup>3</sup> | [M + K] <sup>+</sup> Theoretical monoisotopic <i>m/z</i> | Measured mean <i>m/z</i> | Measured standard deviation <i>m/z</i>        | Mean error of measured vs. theoretical <i>m/z</i> (in ppm) <sup>3</sup> | Measured mean <i>m/z</i> | Measured standard deviation <i>m/z</i> | Mean error of measured vs. theoretical <i>m/z</i> (in ppm) <sup>3</sup> |
| PA-34:3          | C37H67O8P | K <sup>+</sup> , Na <sup>+</sup> | PA(16:0/18:3)              | 693.447                                                   | 693.447                  | 0.005                                  | 0.5                                                                     | 693.448                  | 0.010                                  | 0.6                                                                     | 709.421                                                  | 709.421                  | 0.003                                         | 0.4                                                                     | 709.422                  | 0.011                                  | 0.7                                                                     |
| PA-34:2          | C37H69O8P | K <sup>+</sup> , Na <sup>+</sup> | PA(16:0/18:2)              | 695.463                                                   | 695.463                  | 0.002                                  | 0.6                                                                     | 695.461                  | 0.002                                  | 2.1                                                                     | 711.437                                                  | 711.437                  | 0.002                                         | 0.9                                                                     | 711.435                  | 0.002                                  | 2.0                                                                     |
| PA-34:1          | C37H71O8P | K <sup>+</sup> , Na <sup>+</sup> | PA(16:0/18:1)              | 697.478                                                   | 697.479                  | 0.004                                  | 0.9                                                                     | 697.477                  | 0.008                                  | 1.5                                                                     | 713.452                                                  | 713.455                  | 0.003                                         | 4.1                                                                     | 713.451                  | 0.008                                  | 2.2                                                                     |
| PA-36:5          | C39H67O8P | K <sup>+</sup> , Na <sup>+</sup> | PA(18:3/18:2)              | 717.447                                                   | 717.446                  | 0.003                                  | 2.1                                                                     | 717.445                  | 0.006                                  | 3.6                                                                     | 733.421                                                  | 733.420                  | 0.002                                         | 1.3                                                                     | 733.418                  | 0.006                                  | 3.7                                                                     |
| PA-36:4          | C39H69O8P | K <sup>+</sup> , Na <sup>+</sup> | PA(18:2/18:2)              | 719.463                                                   | 719.463                  | 0.002                                  | 0.1                                                                     | 719.461                  | 0.003                                  | 2.3                                                                     | 735.437                                                  | 735.437                  | 0.001                                         | 1.0                                                                     | 735.435                  | 0.003                                  | 2.1                                                                     |
| PA-36:3          | C39H71O8P | K <sup>+</sup> , Na <sup>+</sup> | PA(18:2/18:1)              | 721.478                                                   | 721.479                  | 0.001                                  | 0.6                                                                     | 721.477                  | 0.002                                  | 2.2                                                                     | 737.452                                                  | 737.453                  | 0.001                                         | 1.0                                                                     | 737.451                  | 0.001                                  | 1.9                                                                     |
| PA-36:2          | C39H73O8P | K <sup>+</sup> , Na <sup>+</sup> | PA(18:1/18:1,18:2/18:0)    | 723.494                                                   | 723.495                  | 0.002                                  | 0.8                                                                     | 723.493                  | 0.003                                  | 1.8                                                                     | 739.468                                                  | 739.470                  | 0.002                                         | 2.9                                                                     | 739.468                  | 0.003                                  | 0.5                                                                     |

<sup>1</sup> Determined from ESI-MS/MS and literature<sup>2</sup> Fatty Acid Abbreviations: M-14:0 Myristic; P-16:0 palmitic; Po-16:1 palmitoleic, Ln-18:3 linolenic; L-18:2 linoleic; O-18:1 oleic acid; S-18:0 stearic; A-20:0 arachidic; B-22:0 behenic; Sc-19:1 sterculic; Dsc-19:0 dihydrosterculic acid<sup>3</sup> PPM = parts per million; ( |measured mean *m/z* - theoretical monoisotopic *m/z* | / theoretical monoisotopic *m/z* \* 10<sup>6</sup> )
